# Supplementary material for: Increased expression of PSME2 is associated with clear cell renal cell carcinoma invasion by regulating BNIP3-mediated autophagy
Source: PubMed Central journal article supplement — Int J Oncol. 2021 Nov 15;59(6):106. doi: 10.3892/ijo.2021.5286 (PMC8651225; doi:10.3892/ijo.2021.5286), 2021-11-15

Figure S1. mRNA expression levels of BNIP3 were examined by RT-qPCR after si-BNIP3 or BNIP3-overexpressed plasmid incubation in CAKI-1 cells. \*P<0.05.

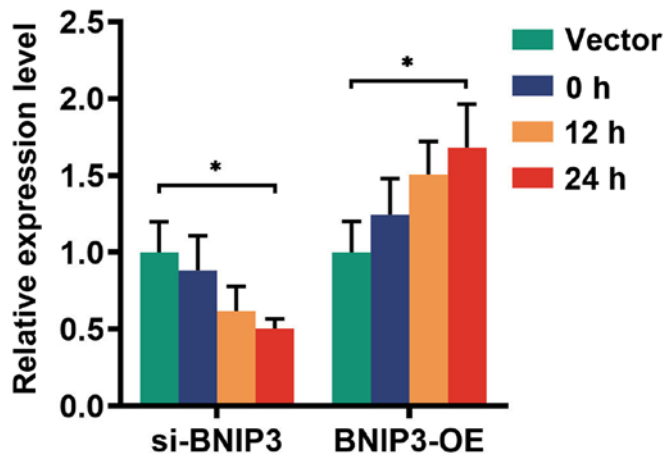

Supplement: Supplementary_Data.pdf [file Supplementary_Data.pdf]
